# Supplementary material for: Water level change of Lake Machang in eastern China over 1814–1902 CE
Source: Copernicus journal article supplement (doi:10.5194/cp-18-649-2022), 2022-04-01
Supplement: Supplementary file 1 [file cp-18-649-2022-supplement.pdf]

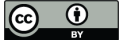

*Supplement of*

## **Water level change of Lake Machang in eastern China over 1814–1902 CE**

**Jie Fei**

*Correspondence to:* Jie Fei ([jiefei@fudan.edu.cn](mailto:jiefei@fudan.edu.cn))

The copyright of individual parts of the supplement might differ from the article licence.



# THE PLAN OF THE SOUTHERN PART OF THE GRAND CANAL INCLUDING THE SHALLOW LAKES AND SWAMPS

SCALE 1:200000

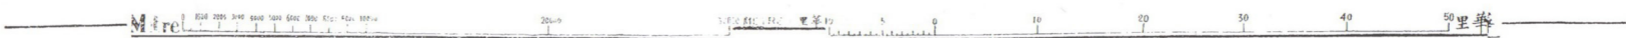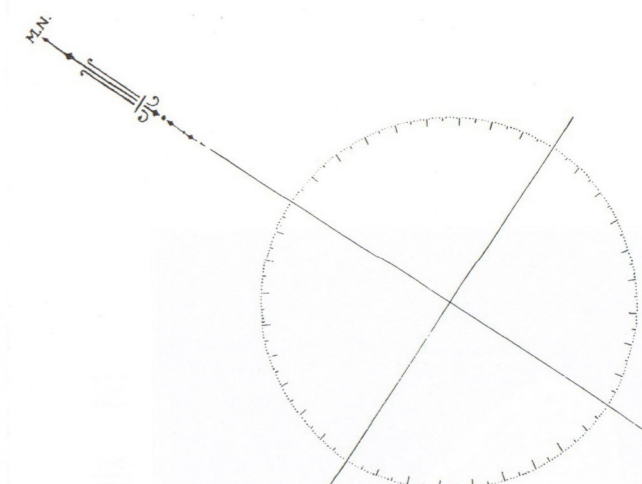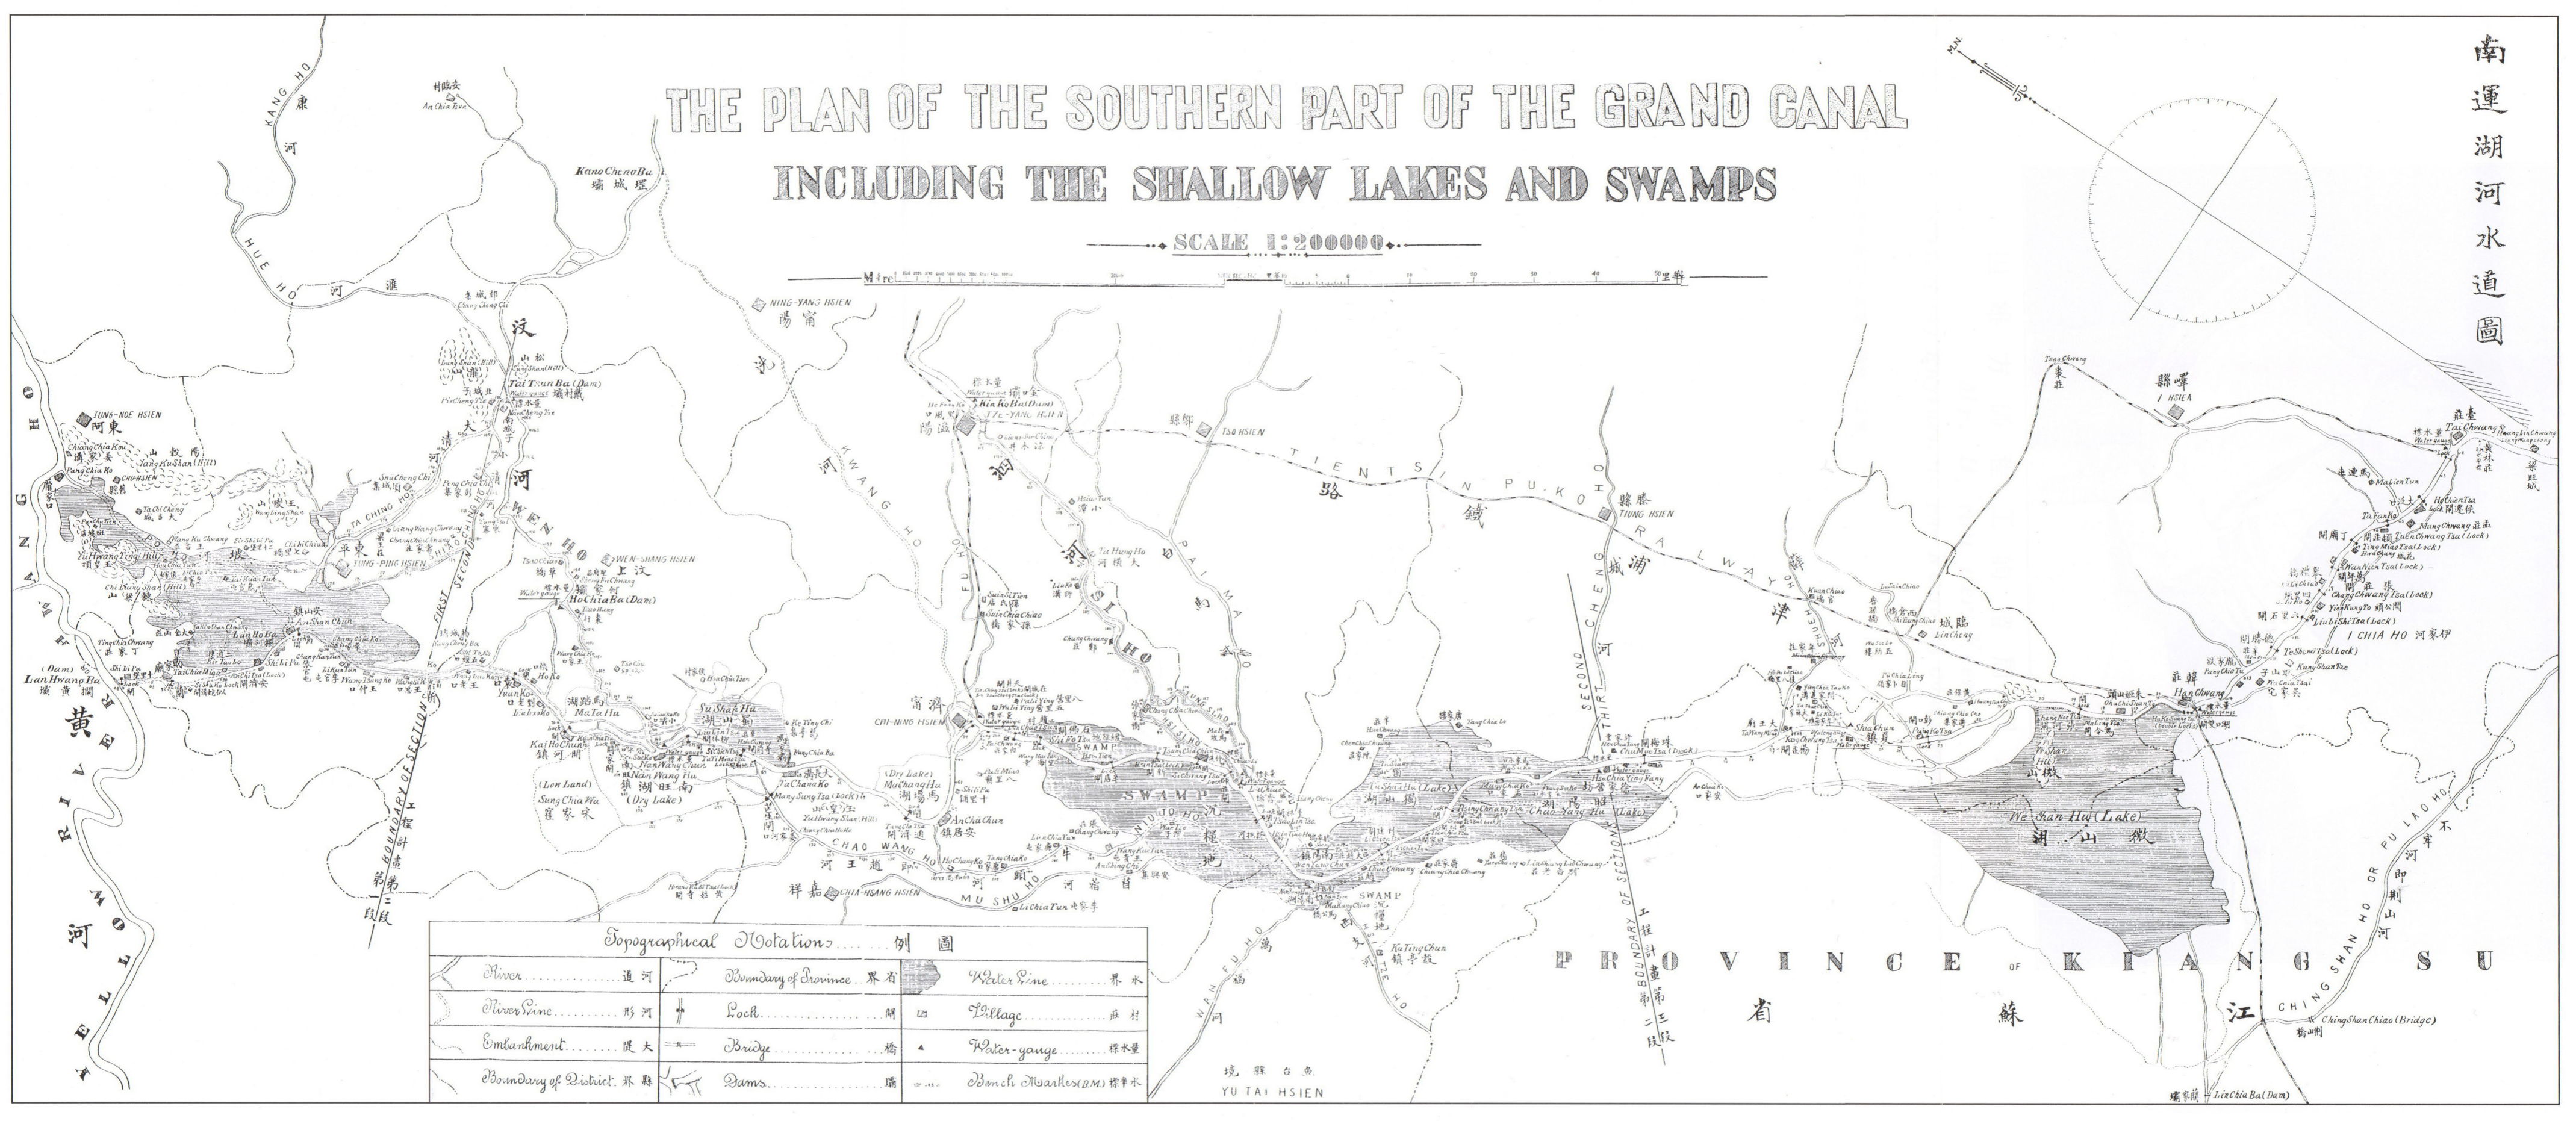

**Topographical Notations 例圖**

|                      |    |                      |    |                    |     |
|----------------------|----|----------------------|----|--------------------|-----|
| River                | 道河 | Boundary of Province | 界省 | Water Line         | 界水  |
| River Line           | 形河 | Lock                 | 開  | Village            | 莊村  |
| Embankment           | 堤大 | Bridge               | 橋  | Water-gauge        | 標水量 |
| Boundary of District | 界縣 | Dams                 | 壩  | Bench Marks (B.M.) | 標準水 |

PROVINCE OF KIANGSU 省 蘇

境縣台魚 YU TAI HSIEN

壩家龍 Lin Chia Ba (Dam)
